# Supplementary material for: Spectroscopic study of the Ne–Xe–NH3 van der Waals trimer
Source: Royal Society of Chemistry journal article supplement (doi:10.1039/b719166a), 2008-01-01
Supplement: b719166a.pdf [file b719166a.pdf]

Table S1: Measured transition frequencies of  $^{20}\text{Ne}\text{-}^{14}\text{NH}_3$  isotopomers.

| $J'_{Ka'Kc'}$<br>$J''_{Ka''Kc''}$ | $F'-F''$ | $^{20}\text{Ne}\text{-}^{132}\text{Xe}\text{-}^{14}\text{NH}_3$ |                        | $^{20}\text{Ne}\text{-}^{129}\text{Xe}\text{-}^{14}\text{NH}_3$ |                      |
|-----------------------------------|----------|-----------------------------------------------------------------|------------------------|-----------------------------------------------------------------|----------------------|
|                                   |          | $\nu_{\text{obs}}$<br>(MHz)                                     | $\Delta\nu^a$<br>(kHz) | $\nu_{\text{obs}}$<br>(MHz)                                     | $\Delta\nu$<br>(kHz) |
| 2 <sub>02</sub> -1 <sub>01</sub>  | 1-0      | 4740.5171                                                       | 6.6                    | 4761.1563                                                       | 6.8                  |
|                                   | 2-2      | 4740.5171                                                       | 2.3                    | 4761.1563                                                       | 2.7                  |
|                                   | 3-2      | 4740.5413                                                       | 0.1                    | 4761.1827                                                       | 0.9                  |
|                                   | 2-1      | 4740.5413                                                       | -3.8                   | 4761.1827                                                       | -2.9                 |
|                                   | 1-1      | 4740.5845                                                       | -1.7                   | 4761.2281                                                       | -1.5                 |
| 2 <sub>12</sub> -1 <sub>11</sub>  | 2-1      | 4413.1481                                                       | -3.7                   | 4431.3079                                                       | -4.3                 |
|                                   | 3-2      | 4413.1828                                                       | 2.7                    | 4431.3451                                                       | 2.7                  |
| 2 <sub>11</sub> -1 <sub>10</sub>  | 2-1      | 5138.3784                                                       | -3.1                   | 5162.8619                                                       | -3.3                 |
|                                   | 3-2      | 5138.4183                                                       | 2.4                    | 5162.9005                                                       | -0.8                 |
|                                   | 1-1      | 5138.4757                                                       | -0.8                   | 5162.9626                                                       | 1.1                  |
| 3 <sub>03</sub> -2 <sub>02</sub>  | 2-1      | 7023.9188                                                       | -4.5                   | 7053.2525                                                       | -4.3                 |
|                                   | 4-3      | 7023.9309                                                       | -0.7                   | 7053.2647                                                       | -0.7                 |
|                                   | 3-2      | 7023.9418                                                       | 2.3                    | 7053.2745                                                       | 1.1                  |
| 3 <sub>13</sub> -2 <sub>12</sub>  | 3-2      | 6598.0149                                                       | -2.4                   | 6624.8533                                                       | -1.5                 |
|                                   | 4-3      | 6898.0234                                                       | 0.6                    | 6624.8619                                                       | 1.0                  |
|                                   | 2-1      | 6598.0348                                                       | 4.2                    | 6624.8717                                                       | 3.0                  |
| 3 <sub>12</sub> -2 <sub>11</sub>  | 2-1      | 7683.0209                                                       | -3.1                   | 7719.2727                                                       | -2.4                 |
|                                   | 3-2      | 7683.0209                                                       | -4.0                   | 7719.2727                                                       | -2.9                 |
|                                   | 4-3      | 7683.0386                                                       | 5.1                    | 7719.2905                                                       | 5.9                  |
| 4 <sub>04</sub> -3 <sub>03</sub>  | 3-2      | 9214.8547                                                       | -0.6                   | 9251.3763                                                       | 0.2                  |
|                                   | 5-4      | 9214.8547                                                       | -5.0                   | 9251.3763                                                       | -4.4                 |
|                                   | 4-3      | 9214.8741                                                       | 3.9                    | 9251.3948                                                       | 3.6                  |
| 4 <sub>14</sub> -3 <sub>13</sub>  | 3-2      | 8759.7341                                                       | -0.3                   | 8794.8504                                                       | -0.3                 |
|                                   | 4-3      | 8759.7341                                                       | 2.3                    | 8794.8504                                                       | 2.4                  |
|                                   | 5-4      | 8759.7341                                                       | 1.9                    | 8794.8504                                                       | 1.9                  |
| 4 <sub>13</sub> -3 <sub>12</sub>  | 3-2      | 10195.2118                                                      | 3.1                    | 10242.5637                                                      | 2.6                  |
|                                   | 4-3      | 10195.2118                                                      | -1.4                   | 10242.5637                                                      | -1.9                 |
|                                   | 5-4      | 10195.2118                                                      | -3.0                   | 10242.5637                                                      | -3.6                 |
| 5 <sub>15</sub> -4 <sub>14</sub>  | 6-5      | 10895.0935                                                      | 0.3                    | 10938.0860                                                      | 0.1                  |
|                                   | 4-3      | 10895.0935                                                      | -0.6                   | 10938.0860                                                      | -0.7                 |
|                                   | 5-4      | 10895.0935                                                      | -1.3                   | 10938.0860                                                      | -1.4                 |
| 1 <sub>11</sub> -0 <sub>00</sub>  | 0-1      | 4996.7620                                                       | -1.4                   | 5000.5566                                                       | 0.0                  |
|                                   | 2-1      | 4996.8488                                                       | -0.2                   | 5000.6432                                                       | -0.1                 |
|                                   | 1-1      | 4996.9063                                                       | 0.3                    | 5000.7008                                                       | -0.3                 |
| 2 <sub>12</sub> -1 <sub>01</sub>  | 1-0      | 7021.8613                                                       | 2.3                    | 7033.1506                                                       | 0.9                  |
|                                   | 3-2      | 7021.9217                                                       | 1.4                    | 7033.2145                                                       | 1.4                  |
|                                   | 2-1      | 7021.9798                                                       | 0.5                    | 7033.2728                                                       | 0.01                 |
| 3 <sub>13</sub> -2 <sub>02</sub>  | 4-3      | 8879.4015                                                       | -0.4                   | 8896.8930                                                       | 0.8                  |
|                                   | 3-2      | 8879.4483                                                       | -3.1                   | 8896.9389                                                       | -3.1                 |
| 3 <sub>03</sub> -2 <sub>12</sub>  | 4-3      | 4742.5519                                                       | -0.6                   | 4781.2336                                                       | -0.5                 |

<sup>a</sup> $\Delta\nu = \nu_{\text{obs}} - \nu_{\text{cal}}$ .

Table S2: Measured transition frequencies of Ne-Xe-<sup>15</sup>NH<sub>3</sub> isotopomers.

| $J'_{Ka'Kc} - J''_{Ka''Kc}$      | <sup>20</sup> Ne- <sup>132</sup> Xe- <sup>15</sup> NH <sub>3</sub> |                                 | <sup>20</sup> Ne- <sup>129</sup> Xe- <sup>15</sup> NH <sub>3</sub> |                      | <sup>22</sup> Ne- <sup>132</sup> Xe- <sup>15</sup> NH <sub>3</sub> |                      | <sup>22</sup> Ne- <sup>129</sup> Xe- <sup>15</sup> NH <sub>3</sub> |                      |
|----------------------------------|--------------------------------------------------------------------|---------------------------------|--------------------------------------------------------------------|----------------------|--------------------------------------------------------------------|----------------------|--------------------------------------------------------------------|----------------------|
|                                  | $\nu_{\text{obs}}$<br>(MHz)                                        | $\Delta\nu^{\text{a}}$<br>(kHz) | $\nu_{\text{obs}}$<br>(MHz)                                        | $\Delta\nu$<br>(kHz) | $\nu_{\text{obs}}$<br>(MHz)                                        | $\Delta\nu$<br>(kHz) | $\nu_{\text{obs}}$<br>(MHz)                                        | $\Delta\nu$<br>(kHz) |
| 2 <sub>02</sub> -1 <sub>01</sub> | 4642.2352                                                          | 1.7                             | 4662.8557                                                          | 1.4                  | 4459.7826                                                          | -1.7                 | 4480.3756                                                          | -0.8                 |
| 2 <sub>12</sub> -1 <sub>11</sub> | 4319.8333                                                          | -1.2                            | 4337.9694                                                          | -3.2                 | 4150.1521                                                          | -0.2                 | 4168.2652                                                          | -1.2                 |
| 2 <sub>11</sub> -1 <sub>10</sub> | 5035.5361                                                          | -1.5                            | 5060.0451                                                          | -2.7                 | 4837.6497                                                          | 1.3                  | 4862.1202                                                          | 0.5                  |
| 3 <sub>03</sub> -2 <sub>02</sub> | 6876.0857                                                          | -0.9                            | 6905.3473                                                          | 0.02                 | 6605.7604                                                          | -0.8                 | 6634.9799                                                          | -1.1                 |
| 3 <sub>13</sub> -2 <sub>12</sub> | 6457.9438                                                          | 1.6                             | 6484.7365                                                          | 4.7                  | 6204.2570                                                          | 0.3                  | 6231.0144                                                          | 0.6                  |
| 3 <sub>12</sub> -2 <sub>11</sub> | 7528.6488                                                          | 0.8                             | 7564.9285                                                          | 1.4                  | 7232.7677                                                          | -1.0                 | 7268.9870                                                          | -0.1                 |
| 4 <sub>04</sub> -3 <sub>03</sub> | 9017.4658                                                          | -0.5                            | 9053.8311                                                          | -1.8                 | 8662.8421                                                          | 1.8                  | 8699.1614                                                          | 1.9                  |
| 4 <sub>14</sub> -3 <sub>13</sub> |                                                                    |                                 |                                                                    |                      | 8236.1142                                                          | 0.5                  | 8271.1084                                                          | 0.5                  |
| 4 <sub>13</sub> -3 <sub>12</sub> |                                                                    |                                 |                                                                    |                      | 9596.5171                                                          | 0.2                  | 9643.8012                                                          | -0.1                 |
| 5 <sub>05</sub> -4 <sub>04</sub> |                                                                    |                                 |                                                                    |                      | 10630.4409                                                         | -1.3                 | 10672.8427                                                         | -1.2                 |
| 1 <sub>11</sub> -0 <sub>00</sub> | 4859.9758                                                          | 1.2                             | 4863.7488                                                          | 2.6                  | 4665.7750                                                          | 1.6                  | 4669.5628                                                          | 0.8                  |
| 2 <sub>12</sub> -1 <sub>01</sub> | 6840.7625                                                          | -1.5                            | 6852.0078                                                          | -2.5                 | 6568.7902                                                          | -1.8                 | 6580.0447                                                          | -1.1                 |
| 3 <sub>13</sub> -2 <sub>02</sub> | 8656.4730                                                          | 0.3                             | 8673.8880                                                          | 0.1                  | 8313.2649                                                          | 0.5                  | 8330.6835                                                          | 0.4                  |
| 4 <sub>14</sub> -3 <sub>03</sub> |                                                                    |                                 |                                                                    |                      | 9943.6172                                                          | 0.3                  | 9966.8102                                                          | 0.1                  |
| 4 <sub>04</sub> -3 <sub>13</sub> |                                                                    |                                 |                                                                    |                      | 6955.3376                                                          | 0.5                  | 7003.4575                                                          | 0.2                  |

$$^{\text{a}} \Delta\nu = \nu_{\text{obs}} - \nu_{\text{cal.}}$$

Table S3: Measured transition frequencies of Ne-<sup>131</sup>Xe-<sup>15</sup>NH<sub>3</sub> isotopomers.

| $J'_{Ka'Kc} - J''_{Ka''Kc}$      | $F' - F''$ | <sup>20</sup> Ne- <sup>131</sup> Xe- <sup>15</sup> NH <sub>3</sub> |                        | <sup>22</sup> Ne- <sup>131</sup> Xe- <sup>15</sup> NH <sub>3</sub> |                      |
|----------------------------------|------------|--------------------------------------------------------------------|------------------------|--------------------------------------------------------------------|----------------------|
|                                  |            | $\nu_{\text{obs}}$<br>(MHz)                                        | $\Delta\nu^a$<br>(kHz) | $\nu_{\text{obs}}$<br>(MHz)                                        | $\Delta\nu$<br>(kHz) |
| 2 <sub>02</sub> -1 <sub>01</sub> | 1.5-1.5    |                                                                    |                        | 4466.1876                                                          | 1.8                  |
|                                  | 3.5-2.5    | 4648.9584                                                          | -0.0                   | 4466.500                                                           | 1.5                  |
|                                  | 2.5-2.5    |                                                                    |                        | 4466.9605                                                          | 0.3                  |
|                                  | 1.5-0.5    |                                                                    |                        | 4466.9840                                                          | -3.1                 |
| 2 <sub>12</sub> -1 <sub>11</sub> | 3.5-2.5    |                                                                    |                        | 4155.9755                                                          | -0.7                 |
|                                  | 2.5-1.5    |                                                                    |                        | 4156.4239                                                          | 2.5                  |
| 2 <sub>11</sub> -1 <sub>10</sub> | 0.5-0.5    |                                                                    |                        | 4845.2320                                                          | -0.03                |
|                                  | 1.5-0.5    |                                                                    |                        | 4845.3143                                                          | 0.9                  |
|                                  | 3.5-2.5    |                                                                    |                        | 4845.5819                                                          | 0.8                  |
|                                  | 2.5-2.5    |                                                                    |                        | 4845.6607                                                          | -1.8                 |
| 3 <sub>03</sub> -2 <sub>02</sub> | 1.5-1.5    | 6885.2885                                                          | 0.7                    | 6614.9650                                                          | -0.9                 |
|                                  | 2.5-2.5    | 6885.4461                                                          | 0.1                    | 6615.1208                                                          | 0.5                  |
|                                  | 4.5-3.5    | 6885.6613                                                          | -0.7                   | 6615.3267                                                          | 3.4                  |
|                                  | 3.5-2.5    |                                                                    |                        | 6615.3405                                                          | -5.5                 |
|                                  | 1.5-0.5    |                                                                    |                        | 6615.4302                                                          | 3.4                  |
|                                  | 2.5-1.5    | 6885.7917                                                          | -0.9                   | 6615.4485                                                          | -1.0                 |
| 3 <sub>13</sub> -2 <sub>12</sub> | 3.5-3.5    | 6886.1676                                                          | 0.8                    | 6615.8075                                                          | 0.6                  |
|                                  | 4.5-3.5    |                                                                    |                        | 6212.9860                                                          | 1.9                  |
|                                  | 1.5-0.5    |                                                                    |                        | 6213.0172                                                          | -2.9                 |
|                                  | 3.5-2.5    |                                                                    |                        | 6213.0999                                                          | -0.1                 |
|                                  | 2.5-1.5    |                                                                    |                        | 6213.1352                                                          | -0.8                 |
| 3 <sub>12</sub> -2 <sub>11</sub> | 1.5-0.5    |                                                                    |                        | 7244.5747                                                          | 0.1                  |
|                                  | 4.5-3.5    |                                                                    |                        | 7244.6093                                                          | 0.5                  |
|                                  | 2.5-1.5    |                                                                    |                        | 7244.6914                                                          | 0.2                  |
|                                  | 3.5-2.5    |                                                                    |                        | 7244.7247                                                          | -0.7                 |
| 1 <sub>11</sub> -0 <sub>00</sub> | 1.5-1.5    | 4861.1259                                                          | 0.8                    | 4666.9497                                                          | -1.5                 |
|                                  | 2.5-1.5    | 4861.2336                                                          | -1.7                   | 4667.0335                                                          | 0.9                  |
|                                  | 0.5-1.5    | 4861.3243                                                          | 0.9                    | 4667.0999                                                          | 2.3                  |
| 2 <sub>12</sub> -1 <sub>01</sub> | 1.5-1.5    |                                                                    |                        | 6572.1270                                                          | -1.8                 |
|                                  | 2.5-1.5    |                                                                    |                        | 6572.3869                                                          | -1.7                 |
|                                  | 3.5-2.5    |                                                                    |                        | 6572.4704                                                          | 0.4                  |
|                                  | 0.5-0.5    |                                                                    |                        | 6572.5658                                                          | -0.5                 |
|                                  | 2.5-2.5    |                                                                    |                        | 6572.8320                                                          | -1.8                 |
|                                  | 1.5-0.5    |                                                                    |                        | 6572.9317                                                          | 1.7                  |
| 3 <sub>13</sub> -2 <sub>02</sub> | 4.5-3.5    |                                                                    |                        | 8318.9537                                                          | -1.1                 |
|                                  | 3.5-2.5    |                                                                    |                        | 8318.9793                                                          | 5.7                  |
|                                  | 1.5-0.5    |                                                                    |                        | 8319.0559                                                          | -4.3                 |
|                                  | 2.5-1.5    |                                                                    |                        | 8319.0806                                                          | 1.6                  |

<sup>a</sup>  $\Delta\nu = \nu_{\text{obs}} - \nu_{\text{cal}}$ .
